# Supplementary material
Source: PubMed Central journal article supplement (PMC9066126)
Supplement: NIHMS1796356-supplement-Suppl_File.pdf [file NIHMS1796356-supplement-Suppl_File.pdf]

1 **Supplemental Table 1.** Distribution of demographic characteristics among children with  
 2 Down syndrome (DS) with comparison between those who obtained a polysomnogram  
 3 (PSG) and those who did not, including those referred or not referred for PSG.  
 4

| Patient Characteristic                    | PSG Obtained<br>n=273 | PSG Not Obtained n=187 |                  | p-value* |
|-------------------------------------------|-----------------------|------------------------|------------------|----------|
|                                           |                       | Not Referred<br>n=145  | Referred<br>n=42 |          |
| Male gender                               | 136 (49.8%)           | 78 (53.8%)             | 28 (66.7%)       | 0.14     |
| Mean age (SD) on 1/1/18 (years)           | 7.3 (1.9)             | 6.7 (1.8)              | 7.5 (1.9)        | 0.02     |
| Race                                      |                       |                        |                  | 0.02**   |
| Caucasian                                 | 218 (79.9%)           | 112 (77.2%)            | 32 (76.2%)       |          |
| Black/African American                    | 21 (7.7)              | 10 (6.9%)              | 8 (19.1%)        |          |
| Asian                                     | 6 (2.2)               | 4 (2.8%)               | 1 (2.4%)         |          |
| Other (includes multi-race)               | 24 (8.8)              | 3 (2.1%)               | 1 (2.4%)         |          |
| Unknown                                   | 4 (1.5)               | 16 (11%)               | 0                |          |
| Ethnicity-Hispanic                        | 19 (7%)               | 5 (3.5%)               | 3 (7.1%)         | 0.36**   |
| Unknown                                   |                       | 5 (3.5%)               |                  |          |
| Insurance status                          |                       |                        |                  | 0.27     |
| Private insurance                         | 177 (64.8%)           | 99 (68.3%)             | 23 (54.8%)       |          |
| Public insurance                          | 82 (30)               | 39 (26.9%)             | 16 (38.1%)       |          |
| Unknown                                   | 14 (5.1)              | 7 (4.8%)               | 3 (7.1%)         |          |
| Median household income (USD)             | 63373 (19449)         | 65273 (22196)          | 56559 (22086)    | 0.03     |
| SES index                                 |                       |                        |                  | 0.18     |
| Highest SES category (>75 <sup>th</sup> ) | 113 (42%)             | 67 (46.2%)             | 13 (40%)         |          |
| Upper 50 <sup>th</sup>                    | 67 (24.9)             | 28 (19.3%)             | 9 (21.4%)        |          |
| Lower 50 <sup>th</sup>                    | 44 (16.4)             | 30 (20.7%)             | 9 (21.4%)        |          |
| Lowest SES category (>25 <sup>th</sup> )  | 45 (16.7)             | 20 (13.8%)             | 11 (26.2%)       |          |
| Live within 25 miles of medical center    | 172 (63.7%)           | 44 (30.3%)             | 22 (52.4%)       | 0.009    |

5 PSG = polysomnogram; SD = standard deviation; USD = US dollars; SES =  
 6 socioeconomic status; n = number of patients

7 \*p-value represents comparison of the two PSG Not Obtained groups

8 \*\*Fisher's Exact Test

9

10

11 **Supplemental Table 2.** Comparison of documented comorbid medical conditions  
 12 among children with Down syndrome (DS) who obtained a polysomnogram (PSG) and  
 13 those who did not, including those referred or not referred for PSG.  
 14

| Comorbid Medical Condition                   | PSG Obtained<br>n=273 | PSG Not Obtained n=187 |                  | p-value |
|----------------------------------------------|-----------------------|------------------------|------------------|---------|
|                                              |                       | Not Referred<br>n=145  | Referred<br>n=42 |         |
| Congenital heart disease                     | 59 (21.6%)            | 30 (20.7%)             | 14 (33.3%)       | 0.10    |
| Hypothyroidism                               | 51 (18.7%)            | 10 (6.9%)              | 6 (14.3%)        | 0.21    |
| Pulmonary aspiration                         | 28 (10.3%)            | 4 (2.8%)               | 3 (7.1%)         | 0.19    |
| Asthma/Reactive airway disease               | 7 (2.6%)              | 1 (0.7%)               | 1 (2.4%)         | 0.40    |
| Attention-deficit/<br>hyperactivity disorder | 7 (2.6%)              | 0                      | 1 (2.4%)         | 0.22    |
| Autism spectrum disorder                     | 8 (2.9%)              | 4 (2.8%)               | 0                | 0.58    |

15 \*p-value represents comparison of the two PSG Not Obtained groups, Fisher's Exact  
 16 Test reported  
 17 PSG = polysomnogram; n = number of patients  
 18
